# Supplementary material for: CRISPR/Cas12a-Assisted Dual Visualized Detection of SARS-CoV-2 on Frozen Shrimps
Source: MDPI journal article supplement (doi:10.3390/bios13010138), 2023-01-14
Supplement: s1 [file s1]

---

## Supporting Information

# CRISPR/Cas12a-assisted dual visualized detection of SARS-CoV-2 on frozen shrimps

Siwenjie Qian <sup>1</sup>, Yanju Chen <sup>1</sup>, Xiaofu Wang <sup>2</sup>, Tingzhang Wang <sup>3</sup>, Yang Che <sup>3</sup>, Jian Wu <sup>1,4</sup>, Zhangying Ye <sup>1</sup> and Junfeng Xu <sup>2,\*</sup>

<sup>1</sup> College of Biosystems Engineering and Food Science, Zhejiang University, Hangzhou, 310058, China

<sup>2</sup> State Key Laboratory for Managing Biotic and Chemical Threats to the Quality and Safety of Agro-products, Zhejiang Academy of Agricultural Sciences, Hangzhou 310021, China

<sup>3</sup> Key Laboratory of Microbiol Technology and Bioinformatics of Zhejiang Province, Zhejiang Institute of Microbiology, Hangzhou, 310012, China

<sup>4</sup> Key Laboratory of on Site Processing Equipment for Agricultural Products, Ministry of Agriculture, Hangzhou, 310058, China

\* Correspondence: xujunfeng@zaas.ac.cn

### **Preparation of spiked frozen shrimp**

The preparation process of spiked frozen shrimp samples was similar to that reported by our group previously [1]. Fresh shrimp samples were purchased from local supermarket. They were immersed in 75% ethanol for 2 min to eliminate background microorganisms. After washing in RNase-free water, shrimp samples were placed in a biological safety hood under ultraviolet light for 30 min. And then the sterile shrimp were placed in a freezer at -20 °C for 24 hours. A series of gradient concentrations of SARS-CoV-2 pseudovirus suspensions were prepared with PBS. Shrimp samples were incubated in SARS-CoV-2 suspensions for 30 min at 2 °C. Then they were transferred to clean plates and kept for another 30 min to allow viruses attachment at -20 °C.

### **Analysis of melting curve**

For the melting curve analysis, after PCR and LAMP amplification, the reaction mixtures containing amplicons were firstly heated at 95 °C for 3 min. Then, the temperature of reaction mixtures was dropped to 60 °C. Melting process was performed at an ascent rate of 0.15 °C/s from 60 °C to 95 °C and the fluorescent signal was recorded every 2 s. The whole operation process was conducted in a QuantStudio™ 3 Real-Time PCR System (Thermo Fisher Scientific Inc., Waltham, MA, USA).

**Table S1.** The sequence information of primers, crRNA and ssDNA probe.

| Category                      | Name                    | Sequence                                          |
|-------------------------------|-------------------------|---------------------------------------------------|
| Primers for SARS-CoV-2        | F3-SARS-CoV-2           | GCCAAAAGGCTTCTACGCA                               |
|                               | B3-SARS-CoV-2           | TTGCTCTCAAGCTGGTTCAA                              |
|                               | FIP-SARS-CoV-2          | TCCCCTACTGCTGCCTGGAG-GCAGTCAA-<br>GCCTCTTCTCG     |
|                               | BIP-SARS-CoV-2          | TCTCCTGCTAGAATGGCTGGCA-TCTGTCAA-<br>GCAGCAGCAAAG  |
|                               | LF-SARS-CoV-2           | GAACTGTTGCGACTACGTGA                              |
|                               | LB-SARS-CoV-2           | GGCGGTGATGCTGCTCT                                 |
| Primers for MS2 phage RNA [2] | F3-MS2 phage RNA        | CCGACAGCATGAAGTCCG                                |
|                               | B3-MS2 phage RNA        | AGCCCGCCACCTTTC                                   |
|                               | FIP-MS2 phage RNA       | CTCCTGAGGGAATGTGGGAACC<br>CCGGCGTGCGCGTTAT        |
|                               | BIP-MS2 phage RNA       | GCCAGCGAGCTCTCCTCGGGCA<br>CCCGTGCTCTTTCGA         |
|                               | LF-MS2 phage RNA        | GCTGACCGAGGGACCCC                                 |
|                               | LB-MS2 phage RNA        | GTTAGCCACTCCGAAGTGCG                              |
| crRNA for SARS-CoV-2          | crRNA-SARS-CoV-2        | UAAUUUCUACUAAGUGUAGAU-<br>UUGAACUGUUGCGACUACGUGAU |
| ssDNA probe                   | Cas12a-probe-SARS-CoV-2 | 6-FAM-TTATT-BHQ <sub>1</sub>                      |

**Table S2.** The sequence information of four primer sets for LAMP.

| Name             | Sequence                                    |
|------------------|---------------------------------------------|
| SARS-CoV-2-F3-1  | GCCAAAAGGCTTCTACGCA                         |
| SARS-CoV-2-B3 -1 | TTGCTCTCAAGCTGGTCAA                         |
| SARS-CoV-2-FIP-1 | TCCCCTACTGCTGCCTGGAG-GCAGTCAAGCCTCTTCTCG    |
| SARS-CoV-2-BIP-1 | TCTCCTGCTAGAATGGCTGGCA-TCTGTCAAGCAGCAGCAAAG |
| SARS-CoV-2-LF-1  | GAACTGTTGCGACTACGTGA                        |
| SARS-CoV-2-LB-1  | GGCGGTGATGCTGCTCT                           |
| SARS-CoV-2-F3-2  | CCAGAATGGAGAACGCAGTG                        |
| SARS-CoV-2-B3-2  | CCGTCACCACCACGAATT                          |
| SARS-CoV-2-FIP-2 | AGCGGTGAACCAAGACGCAG-GGCGCGATCAAAACAACG     |
| SARS-CoV-2-BIP-2 | AATTCCCTCGAGGACAAGGCG-AGCTCTTCGGTAGTAGCCAA  |
| SARS-CoV-2-LF-2  | TTATTGGGTAAACCTTGGGGC                       |
| SARS-CoV-2-LB-2  | TCCAATTAACACCAATAGCAGTCC                    |
| SARS-CoV-2-F3-3  | TGGACCCCAAAATCAGCG                          |
| SARS-CoV-2-B3-3  | GCCTTGTCCTCGAGGGAAT                         |
| SARS-CoV-2-FIP-3 | CCACTGCGTTCTCCATTCTGGT-AAATGCACCCCGCATTACG  |
| SARS-CoV-2-BIP-3 | CGCGATCAAAACAACGTCGGCCC-TTGCCATGTTGAGTGAGA  |
| SARS-CoV-2-LF-3  | TGAATCTGAGGGTCCACCAA                        |
| SARS-CoV-2-LB-3  | GGTTTACCCAATAATACTGCGTCTT                   |
| SARS-CoV-2-F3-4  | AGATCACATTGGCACCCG                          |
| SARS-CoV-2-B3-4  | CCATTGCCAGCCATTCTAGC                        |
| SARS-CoV-2-FIP-4 | TGCTCCCTTCTGCGTAGAAGCCAATGCTGCAATCGTGCTAC   |
| SARS-CoV-2-BIP-4 | GGCGGCAGTCAAGCCTCTTCCCTACTGCTGCCTGGAGTT     |
| SARS-CoV-2-LF-4  | GCAATGTTGTTTCCTTGAGGAAGTT                   |
| SARS-CoV-2-LB-4  | GTCCTCATCACGTAGTCGCAACA                     |

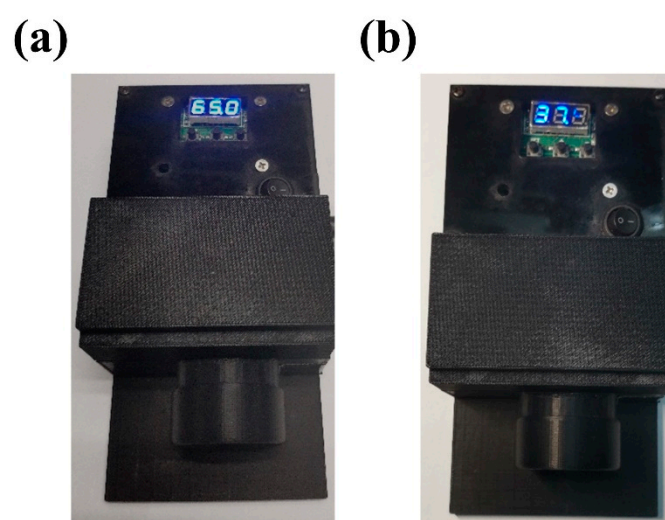

**Figure S1.** The portable device for LAMP reaction (a), and visualized fluorescence observation (b).

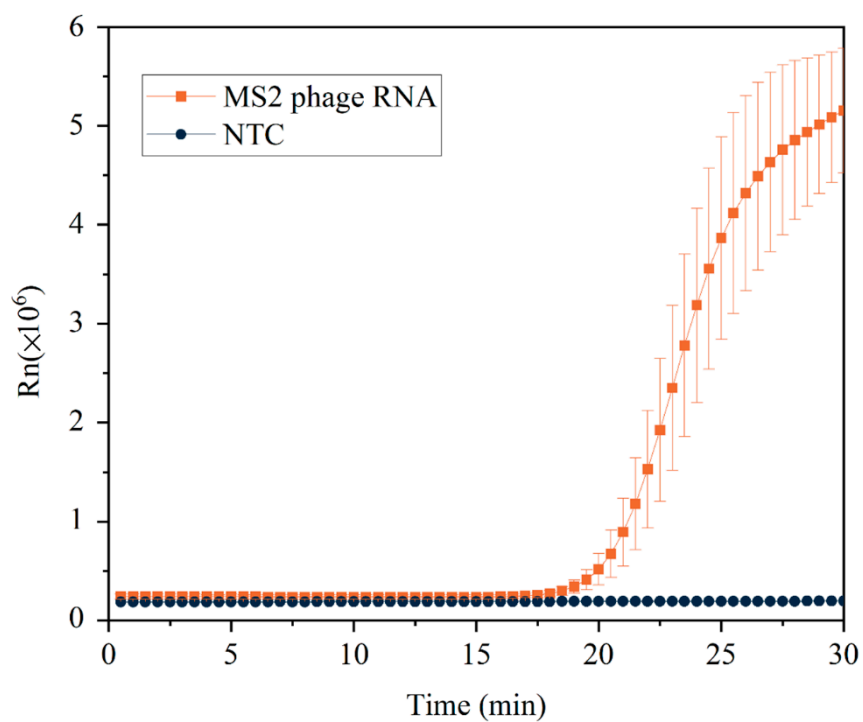

**Figure S2.** The real-time amplification curves of LAMP for MS2 phage RNA (containing 1000 copies/reaction).

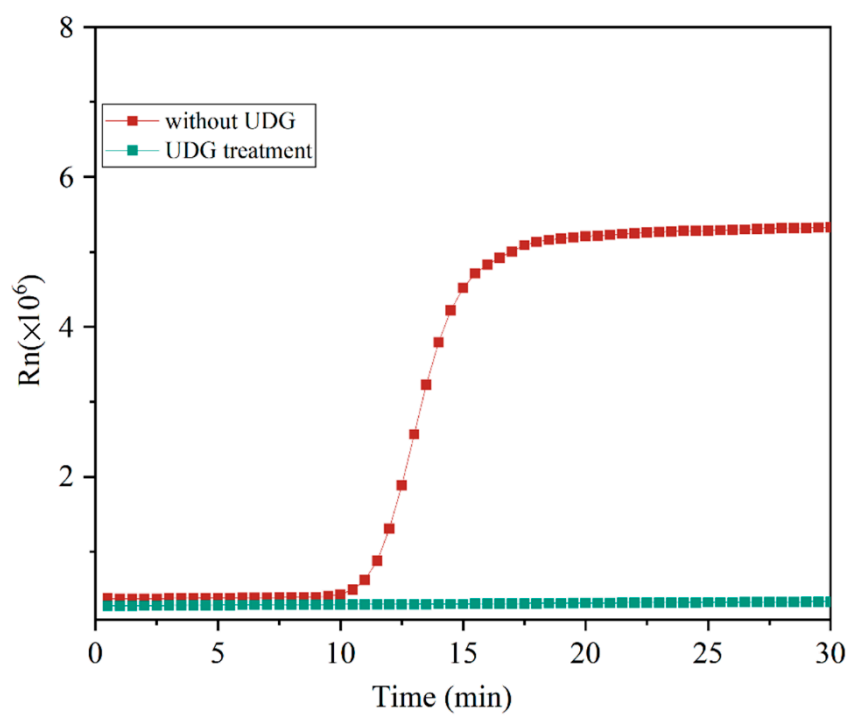

**Figure S3.** The real-time fluorescence amplification curves of LAMP reaction after UDG treatment and without UDG treatment.

## References

- [1] R. Wang, X. Xiao, Y. Chen, J. Wu, W. Qian, L. Wang, Y. Liu, F. Ji, J. Wu, A loop-mediated, isothermal amplification-based method for visual detection of *Vibrio parahaemolyticus* within only 1 h, from shrimp sampling to results, *Anal. Methods*. **2017**, *9*, 1695-1701. <https://doi.org/10.1039/C7AY00165G>.
- [2] I.P. Oscorbin, G.Y. Shevelev, K.A. Pronyaeva, A.A. Stepanov, D.V. Shamovskaya, O.V. Mishukova, D.V. Pyshnyi, M.L. Filipenko, Detection of SARS-CoV-2 RNA by a Multiplex Reverse-Transcription Loop-Mediated Isothermal Amplification Coupled with Melting Curves Analysis, *Int. J. Mol. Sci.* **2021**, *22*, 5743. <https://doi.org/10.3390/ijms22115743>.
